# Supplementary material for: Diabetes medications and risk of Parkinson’s disease: a cohort study of patients with diabetes
Source: PubMed Central journal article supplement — Brain. 2020 Oct 4;143(10):3067–76. doi: 10.1093/brain/awaa262 (PMC7794498; doi:10.1093/brain/awaa262), 2020-10-04
Supplement: awaa262_supplementary_data.pdf [file awaa262_supplementary_data.pdf]

**Supplementary file**

**Protocol** - Protocol for research using THIN

**Table S1.** - Patient characteristics insulin cohort

**Table S2.** - Results analysis insulin cohort

**STROBE Checklist** - Checklist of items that should be included in reports of cohort studies.

## Title of the study

Differential Risk of Parkinson's disease in Diabetes Mellitus Type II patients according to diabetes treatments.

## Background

Several studies have been published exploring the potential of repurposing antidiabetic drugs to treat neurodegenerative diseases such as Parkinson's disease (PD). Three types of antidiabetic drugs are of particular interest with regard to their potential protective effect against PD: Glitazones, dipeptidyl peptidase-4 (DPP4) inhibitors & glucagon-like peptide-1 (GLP-1) receptor agonists.

PPAR $\gamma$  agonist antidiabetic glitazone drugs (pioglitazone and rosiglitazone) were first introduced in 1999. Several observational studies found strong evidence of a protective effect of glitazones on the risk of PD in individuals with diabetes, whilst other studies found no such effect (1-3). The results of the first clinical trial in which the potential of pioglitazone as PD treatment was investigated were negative(4). This can partly be explained by the short duration of the trial, 44 weeks, as any beneficial effects may take longer to show.

Dipeptidyl peptidase-4 (DPP4) inhibitors and glucagon-like peptide-1 (GLP-1) receptor agonists ultimately result in increased GLP1 receptor stimulation, which in turn increases insulin levels. The first DPP4 inhibitor, sitagliptin, and the first GLP-1 receptor agonist, exenatide, were introduced in 2006. A small Scandinavian study found a lower risk of PD among patients treated with dipeptidyl peptidase-4 (DPP4) inhibitors (5). The point estimate for the risk of PD in patients on GLP-1 receptor agonists was less than 1 (i.e. protective) however the small sample size meant that confidence intervals were large and this could not be interpreted as evidence of a protective effect. Positive Phase 2 results of using exenatide in PD patients have been published(6, 7). Multiple other trials of GLP-1 receptor agonists and DPP4 inhibitors are being planned/set up.

The findings of all these studies are interesting in the light of the growing disease burden of PD and the absence of any treatment to change the disease trajectory of PD(8). Parkinson's disease is a degenerative neurological disease primarily characterised by nerve cell death in the substantia nigra and a consequent deficit in the amount of dopamine available in the central nervous system. People with PD gradually develop movement-related symptoms, including tremor, bradykinesia and rigidity. The pathophysiological causes of PD are complex, and are thought to involve oxidative stress, mitochondrial and proteasomal dysfunction and neuroinflammation(9). The lifetime risk of being diagnosed with Parkinson's in the UK is 2.7% and the prevalence is expected to rise by 18% in the next 7 years(8). The overall UK incidence of PD diagnosis for people over 50 years is 84 per 100,000 person years (95 % CI 82-85)(10).

While there are consistent associations between Diabetes Mellitus (DM) and PD risk in large cohort studies(11), there has been very little work exploring the epidemiological associations between DM, different types of antidiabetic drugs and PD risk. We hypothesise that patients with diabetes have a higher risk of Parkinson's disease than non-diabetes patients. We further hypothesise that this risk will be variable according to their diabetes treatment regime.

Our comparative study will be of great value in clinical practice when presented with a choice of oral pharmacological treatment options for diabetes. Assuming similar primary treatment results, comparing treatments that may have secondary benefits (protection against PD) will be of relevance in the decision making process of both clinicians and patients.

## **Purpose**

### **Aim**

The current proposal is to perform a population-based study to assess the effect of diabetes on the risk of Parkinson's disease, and to investigate if this risk is modified according to three different diabetes medications.

### **Objectives**

- To estimate the incidence rate ratio for Parkinson's disease in people with diabetes, comparing individuals diagnosed with diabetes to people without diabetes.
- To compare the risk of PD in individuals treated with or GLP-1 receptor agonists or DPP4 inhibitors or glitazones to people treated with agents other than GLP-1 receptor agonists, DPP4 inhibitors and glitazones.

### **Data source**

THIN offers an ideal source of observational data to examine the association between diabetes and the use of antidiabetic medications and PD onset in a large population. Preliminary exploration of the THIN database reveals;

1. Number of Type 2 DM patients in the THIN database: N=498642

2. Number of patients on following drug treatments:

a) GLP1 agonists (Exenatide, Liraglutide, Lixisenatide): N=21072

b) DPP4 inhibitors (sitagliptin, Saxagliptin, Valdagliptin): N=42689

c) Thiozolidinediones (Pioglitazone, Rosiglitazone): N=69588

A previous study using UK primary health care record found 175 incident PD cases in a population of 45,000 glitazone users. The cohort of users of GLP-1 agonists is small, but with an average follow-up time of 5 years, we expect to find around 40-100 PD cases exposed to GLP1 agonists and between 120-200 cases exposed to DPP-4 inhibitors during the study period.

## **Methods**

### **Study design**

We will conduct a retrospective cohort study comparing the rate of PD diagnosis in people treated with one of three specific types of antidiabetic drugs, compared with people being treated with other antidiabetic drugs.

### **Study population**

We propose to identify a cohort of adults (18+) diagnosed with DM type II between 2006 and 2018. This cohort will be further divided into individuals prescribed GLP-1 agonists, DPP-4 inhibitors and/or glitazones and compared to users of other types of antidiabetic drugs. Individuals with a DM2 diagnosis will be identified by the corresponding Medcode using the medical files (see Appendix 1). DM medication exposure (see Appendix 2) will be defined as at least two consecutive prescriptions for a DM drug after the current practice registration date, the first recorded diagnosis of DM or the date from which the practice's data recording is of sufficient quality and completeness, whichever was latest. Every patient will be followed from the first date for a prescription of an antidiabetic drug (indexdate) onwards.

### **Study variables**

#### *Exposure*

There will be six specific exposure groups of interest, as outlined below:

- 1a) Individuals prescribed GLP-1 agonists as monotherapy or in combination with sulfonylureas or biguanides
- 1b) Individuals prescribed GLP-1 agonists in combination with insulin
- 2a) Individuals prescribed DPP-4 inhibitors as monotherapy or in combination with sulfonylureas or biguanides)
- 2b) Individuals prescribed DPP-4 inhibitors in combination with insulin
- 3a) Individuals prescribed glitazones as monotherapy or in combination with sulfonylureas or biguanides
- 3b) Individuals prescribed glitazones in combination with insulin

Drug propensity scores will be calculated for the individuals in the exposure groups as outlined above.

#### *Selection of comparison groups:*

To address the first objective we will compare the proportion of individuals with a PD diagnosis in those with and without DM type 2 (healthy population). This will be a crude comparison, stratified by age and gender.

To address the second objective, comparator groups will be selected using inverse weighting based on propensity scores. Individuals in Groups 1a, 2a and 3a will be compared to individuals prescribed sulfonylureas or biguanides (both as mono- or oral combination therapy). Individuals in Groups 1b, 2b and 3b will be compared to individuals prescribed insulin (as monotherapy or in combination with sulfonylureas or biguanides).

*Primary outcome of interest:* The outcome for this study is the first recording of a diagnosis of PD, as identified from medical files, using the medcode list in Appendix 3.

*Exclusion criteria:* Patients with PD prior to any DM diagnosis will be excluded as will patients diagnosed with PD due to known causes (see Appendix 3).

## **Analysis**

### *Statistical method*

We will calculate propensity scores using a logistic regression model which will include all of the confounding variables as described in the next paragraph.

We will measure a hazard ratio for the association between DM and incident PD using stratified Cox proportional hazards models to compare time to diagnosis of Parkinson disease in the propensity score-weighted populations. We will estimate the treatment effect in the entire population using inverse probability treatment weighting (IPTW) after imputing missing values for the following variables: smoking, alcohol use and body mass index. Using multiple imputation we will perform a propensity score analysis in each imputed dataset and combine these treatment effect estimates to obtain an overall estimate (12).

The primary analysis will follow all patients from their index date until the earliest of a PD record, transfer out/death, or last data collection extract from practice, and their exposure will remain as defined at the index date.

*Sensitivity analyses* will be as follows:

- Our primary analysis is an ‘intention to treat’ analysis, in which the exposure status remains the same regardless of any changes in medication use. We will censor patients upon discontinuation of the index medication to take into account cessation of therapy. We will introduce a 180 days gradual shift from full exposure to an entirely unexposed state, allowing for potential delayed use of medication.
- To examine any potential duration-response associations we will identify patients with continuous use of the index drug for a minimum duration of: 3 months, 6 months, 9 months, 1 year, 2 years and 3 years or more.
- A stratified analysis will be conducted to look separately at the association between PD and the most commonly used individual drugs (pioglitazone, rosiglitazone, sitagliptin and liraglutide).
- A sensitivity analysis will be conducted using a stricter definition of PD in which at least two prescriptions for an anti-PD drug will be required in addition to a Read code indicating PD.
- Users of antidiabetic agents will be limited to those aged 40 and older and, in a separate analysis, will be restricted to non-smokers.
- GLP1 agonists reduce PD risk partly via a metabolic action that includes reduction in BMI, therefore we will run a sensitivity analysis in which BMI will be removed from the propensity score and, in a separate analysis, added to the model as a confounder.

### **Confounding variables**

Covariates to be included in the Propensity Scores will be:

- Smoking status (measured using the medical and additional health files)
- Hormone Replacement Therapy (HRT) (any recorded prescriptions in the therapy files)
- Head trauma (measured by using the medical files)
- Age and sex (determined using the patient files)
- Calcium channel blocker use (any recorded prescriptions in the therapy files)
- Diabetes itself has been shown to be possibly associated with PD: Length of time between diabetes diagnosis and index date, and HbA1c level at index date will be determined and explored for possible confounding properties. In addition, the effect of time updated HbA1c levels will be explored (using additional health files).
- Comorbid conditions: Cardiovascular or renal disease and potential diabetic complications (e.g., retinopathy, neuropathy using medical files)
- Prescriptions for cardiovascular and renal disease (using therapy files)

Other covariates that have not been shown to be associated with PD will also be explored in case of possible confounding, and will include:

- Alcohol consumption (measured using the additional health and medical files)
- Body mass index (using the additional health files)
- Calendar year (using therapy files)

### **Limitations**

The onset of PD in the context of the current study refers to the first recorded clinical diagnosis of PD in THIN. Patients are likely to have experienced symptoms before the date of their clinical

diagnosis. Diagnoses of PD in UK primary care have a positive predictive value of 90%(13, 14) and so a small degree of misclassification amongst outcomes is expected. However, this is likely to be non-differential with respect to DM treatment status and would be expected to bias results towards the null. In addition, missing cases of PD are likely to be rare in our study population, given that the prevalence of PD is low in the general population.

We will not be able to rule out unknown or unmeasured differences between the treatment and comparison groups. However, by using propensity scores we will be able to adjust for measured confounding and unmeasured confounding due to underlying indication.

Another limitation of our study will be potential exposure misclassification. As with all studies using electronic prescription databases, we will not be able to confirm whether patients picked up and used their prescriptions as intended. Again, any misclassification of exposure is likely to occur to a similar degree in both the treatment and control groups.

### Reference list

1. Brauer R, Bhaskaran K, Chaturvedi N, Dexter DT, Smeeth L, Douglas I. Glitazone Treatment and Incidence of Parkinson's Disease among People with Diabetes: A Retrospective Cohort Study. *PLoS medicine*. 2015;12(7):e1001854.
2. Brakedal B, Flones I, Reiter SF, Torkildsen O, Dolle C, Assmus J, et al. Glitazone use associated with reduced risk of Parkinson's disease. *Movement disorders : official journal of the Movement Disorder Society*. 2017;32(11):1594-9.
3. Connolly JG, Bykov K, Gagne JJ. Thiazolidinediones and Parkinson Disease: A Cohort Study. *American journal of epidemiology*. 2015;182(11):936-44.
4. Investigators NETiPDF-Z. Pioglitazone in early Parkinson's disease: a phase 2, multicentre, double-blind, randomised trial. *The Lancet Neurology*. 2015;14(8):795-803.
5. Svenningsson P, Wirdefeldt K, Yin L, Fang F, Markaki I, Efendic S, et al. Reduced incidence of Parkinson's disease after dipeptidyl peptidase-4 inhibitors-A nationwide case-control study. *Movement disorders : official journal of the Movement Disorder Society*. 2016;31(9):1422-3.
6. Athauda D, Maclagan K, Skene SS, Bajwa-Joseph M, Letchford D, Chowdhury K, et al. Exenatide once weekly versus placebo in Parkinson's disease: a randomised, double-blind, placebo-controlled trial. *Lancet*. 2017;390(10103):1664-75.
7. Aviles-Olmos I, Dickson J, Kefalopoulou Z, Djamshidian A, Kahan J, Ell P, et al. Motor and cognitive advantages persist 12 months after exenatide exposure in Parkinson's disease. *Journal of Parkinson's disease*. 2014;4(3):337-44.
8. UK. Ps. The incidence and prevalence of Parkinson's in the UK. Results from the Clinical Practice Research Datalink Summary report. 2018.
9. Jenner P, Olanow CW. The pathogenesis of cell death in Parkinson's disease. *Neurology*. 2006;66(10 Suppl 4):S24-36.
10. Horsfall L, Petersen I, Walters K, Schrag A. Time trends in incidence of Parkinson's disease diagnosis in UK primary care. *Journal of neurology*. 2013;260(5):1351-7.
11. Xu Q, Park Y, Huang X, Hollenbeck A, Blair A, Schatzkin A, et al. Diabetes and risk of Parkinson's disease. *Diabetes care*. 2011;34(4):910-5.
12. Leyrat C, Seaman SR, White IR, Douglas I, Smeeth L, Kim J, et al. Propensity score analysis with partially observed covariates: How should multiple imputation be used? *Statistical methods in medical research*. 2017:962280217713032.
13. Becker C, Brobert GP, Johansson S, Jick SS, Meier CR. Diabetes in patients with idiopathic Parkinson's disease. *Diabetes care*. 2008;31(9):1808-12.
14. Becker C, Jick SS, Meier CR. Use of antihypertensives and the risk of Parkinson disease. *Neurology*. 2008;70(16 Pt 2):1438-44.

## Appendix 1. Diabetes Medcodes

| Medcode |         |         |         |         |
|---------|---------|---------|---------|---------|
| Cyu2.00 | 66AI.00 | C106y00 | C10FB00 | C109B11 |
| Cyu2000 | 66AJ.00 | C105y00 | C109012 | C10FB11 |
| Cyu2300 | 66AJz00 | C10yy00 | C10F000 | C109011 |
| C10N100 | 13L4.11 | C104y00 | C10F600 | C10F011 |
| C10..00 | 66A3.00 | C10zy00 | C109612 | C10F611 |
| C10D.00 | 66A5.00 | L180600 | C10F400 | C109611 |
| C102z00 | 66AV.00 | L180X00 | C109412 | C109411 |
| C101z00 | 66A4.00 | L180700 | C10F900 | C10F411 |
| C103z00 | 66As.00 | C10N.00 | C109912 | C10F911 |
| C106z00 | 66AL.00 | C10N000 | C109.13 | C109911 |
| C100z00 | 1434    | C10G.00 | C10F.11 | C108z00 |
| C105z00 | C109J11 | C10G000 | C109711 | 66AJ.11 |
| C10yz00 | C109J00 | C109.12 | C10F711 |         |
| C107z00 | C109J12 | C10F.00 | C109G11 |         |
| C10zz00 | C10M.00 | C10F700 | C10FG11 |         |
| C107.11 | C10A.00 | C109712 | C109E11 |         |
| C102.00 | C10A000 | C109G12 | C10FE11 |         |
| C101.00 | C10A100 | C10FG00 | C109511 |         |
| C103.00 | C10A500 | C109E12 | C10F511 |         |
| C104z00 | C100111 | C10FE00 | C109D11 |         |
| C106.00 | C10D.11 | C10FQ00 | C10FD11 |         |
| C106.12 | C109.11 | C10F500 | C10FN11 |         |
| C100.00 | C107400 | C109512 | C10FP11 |         |
| C105.00 | C109E00 | C10FR00 | C109A11 |         |
| C10y.00 | C100112 | C10FD00 | C10FA11 |         |
| C107.00 | C109.00 | C109D12 | C10F311 |         |
| C106.13 | C109700 | C10FN00 | C109C11 |         |
| C104.00 | C109G00 | C10FP00 | C10FC11 |         |
| C10z.00 | C109500 | C10FA00 | C109211 |         |
| C106100 | C109D00 | C10F300 | C10F211 |         |
| C105100 | C109A00 | C109312 | C109H11 |         |
| C10z100 | C109C00 | C10FC00 | C10FH11 |         |
| C100100 | C109B00 | C109C12 | C109111 |         |
| C102100 | C109400 | C109212 | C10F111 |         |
| C101100 | C109300 | C10F200 | C109F11 |         |
| C103100 | C109200 | C109H12 | C10FF11 |         |
| C104100 | C109100 | C10FH00 | C10FM11 |         |
| C107200 | C109000 | C10F100 | C10FL11 |         |
| C10y100 | C109600 | C109112 | C109B11 |         |
| C107100 | C109900 | C109F12 | C10FB11 |         |
| C107000 | C103y00 | C10FF00 | C109011 |         |
| C107.12 | C101y00 | C10FM00 | C10F011 |         |
| 66AK.00 | C108y00 | C10FL00 | C10F611 |         |

## Appendix 2 – Diabetes Drugcodes:

| <b>Drugcode</b>   |              |              |
|-------------------|--------------|--------------|
| <i>Glitazones</i> | <i>DDP-4</i> | <i>GLP-1</i> |
| 88528998          | 31126978     | 39144978     |
| 88523998          | 78729978     | 53433978     |
| 88528996          | 78730978     | 53434978     |
| 88523996          | 78727978     | 53431978     |
| 87180998          | 78728978     | 53432978     |
| 87179998          | 78725978     | 84693998     |
| 87771998          | 78726978     | 84696998     |
| 87770998          | 78723978     | 55150978     |
| 87166998          | 78724978     | 55151978     |
| 87165998          | 54906979     | 81305998     |
| 87774998          | 54907979     | 81307998     |
| 87772998          | 54904979     | 84694998     |
| 85622998          | 54905979     | 84697998     |
| 85624998          | 81159998     | 55818978     |
| 85625998          | 81160998     | 55819978     |
| 91880990          | 82068998     | 55842978     |
| 92237998          | 83401998     | 82793998     |
| 92238998          | 53006979     | 82794998     |
| 47709978          | 53007979     | 52041979     |
| 82196978          | 53004979     | 52043979     |
| 92237997          | 53005979     | 52044979     |
| 92238997          | 81513998     | 52042979     |
| 87884998          | 81514998     | 52039979     |
| 87885998          | 82573998     | 52040979     |
| 87775998          | 82575998     |              |
| 87182998          | 84639998     |              |
| 87773998          | 84640998     |              |
| 89763998          | 59373979     |              |
| 90048998          | 59374979     |              |
| 87181998          | 59371979     |              |
| 89763997          | 59372979     |              |
| 90048997          | 84008998     |              |
| 89763996          | 84010998     |              |
| 90048996          | 84009998     |              |
|                   | 84011998     |              |
|                   | 84338998     |              |
|                   | 84341998     |              |



## Appendix 3 –PD Medcodes

| Include |                                              | Exclude |                                                     |
|---------|----------------------------------------------|---------|-----------------------------------------------------|
| Medcode | Medterm                                      | Medcode | Medterm                                             |
| F12z.00 | Parkinson's disease NOS                      | F121.00 | Parkinsonism secondary to drugs                     |
| F130300 | Parkinsonism with orthostatic hypotension    | F121.11 | Drug induced parkinsonism                           |
| F12..00 | Parkinson's disease                          | F123.00 | Postencephalitic parkinsonism                       |
| F120.00 | Paralysis agitans                            | F124.00 | Vascular parkinsonism                               |
| Eu02300 | [X]Dementia in Parkinson's disease           | F12W.00 | Secondary parkinsonism due to other external agents |
| 297A.00 | O/E - Parkinsonian tremor                    | F12X.00 | Secondary parkinsonism, unspecified                 |
| 2987.00 | O/E -Parkinson flexion posture               | Fyu2200 | [X]Parkinsonism in diseases classified elsewhere    |
| 2987.11 | O/E - Parkinson posture                      | A94y100 | Syphilitic parkinsonism                             |
| 2994.00 | O/E- festination- Parkinson gait             | Fyu2900 | [X]Secondary parkinsonism, unspecified              |
| 2994.11 | O/E - Parkinson gait                         | Fyu2100 | [X]Other secondary parkinsonism                     |
| F11x900 | Cerebral degeneration in Parkinson's disease |         |                                                     |

\* THIN is a registered trademark of Cegedim SA in the United Kingdom and other countries. Reference made to the THIN database is intended to be descriptive of the data asset licensed by IQVIA

Table S1. Patient characteristics insulin cohort

|                                          | Control medication<br>(N=10,504) | Glitazones or DPP4<br>(N=3,175) | GLP-1<br>(N=2004) | Glitazones<br>(N=929) | DPP-4<br>(N=2,246) |
|------------------------------------------|----------------------------------|---------------------------------|-------------------|-----------------------|--------------------|
| Age, mean (SD)                           | 59.75 (15.52)                    | 62.20 (14.67)                   | 56.31 (11.43)     | 58.16 (13.5)          | 63.51 (15.13)      |
| Gender, male (%)                         | 5689 (54.16)                     | 1592 (50.14)                    | 889 (44.36)       | 490 (52.74)           | 1102 (49.07)       |
| <b>Smoking (%)</b>                       |                                  |                                 |                   |                       |                    |
| Current* smoker                          | 1879 (17.97)                     | 367 (11.57)                     | 133 (6.64)        | 133 (14.32)           | 234 (10.42)        |
| Ex-smoker                                | 3713 (35.52)                     | 1227 (38.68)                    | 1094 (54.59)      | 345 (37.14)           | 882 (39.27)        |
| Non-smoker                               | 4862 (46.51)                     | 1578 (49.75)                    | 776 (38.72)       | 450 (48.44)           | 1128 (50.22)       |
| <b>Drinking status</b>                   |                                  |                                 |                   |                       |                    |
| Current drinker                          | 5120 (52.53)                     | 1415 (46.67)                    | 902 (45.01)       | 425 (45.75)           | 990 (44.08)        |
| Ex-drinker                               | 636 (6.53)                       | 273 (9.00)                      | 189 (9.43)        | 62 (6.67)             | 211 (9.39)         |
| Non-drinker                              | 3025 (31.04)                     | 1172 (38.65)                    | 722 (36.03)       | 328 (35.31)           | 844 (37.58)        |
| Excessive drinker                        | 965 (9.90)                       | 172 (5.67)                      | 108 (5.39)        | 57 (6.14)             | 115 (5.12)         |
| <b>BMI, kg/m<sup>2</sup> (%)</b>         |                                  |                                 |                   |                       |                    |
| <18.5                                    | 61 (0.59)                        | 8 (0.26)                        | 3 (0.15)          | 2 (0.22)              | 6 (0.27)           |
| 18.5-24.9                                | 1760 (17.05)                     | 357 (11.41)                     | 29 (1.45)         | 84 (9.04)             | 273 (12.15)        |
| 25-29.9                                  | 3848 (37.28)                     | 940 (30.04)                     | 252 (12.57)       | 296 (31.86)           | 644 (28.67)        |
| ≥30                                      | 4653 (45.08)                     | 1824 (58.29)                    | 1660 (82.83)      | 539 (58.02)           | 1285 (57.21)       |
| Hba1c_level, mean (SD)                   | 8.90 (4.29)                      | 9.23 (4.16)                     | 9.36 (3.97)       | 9.53 (4.49)           | 9.11 (4.01)        |
| <b>Medical diagnoses (%)</b>             |                                  |                                 |                   |                       |                    |
| Head injury                              | 729 (4.08)                       | 182 (5.73)                      | 100 (4.99)        | 58 (6.24)             | 124 (5.52)         |
| Cerebrovascular disease                  | 914 (8.70)                       | 358 (11.28)                     | 154 (7.68)        | 66 (7.10)             | 292 (13.00)        |
| Heart failure                            | 711 (6.77)                       | 286 (9.01)                      | 155 (7.73)        | 35 (3.77)             | 251 (11.18)        |
| Myocardial Infarction                    | 1072 (10.21)                     | 739 (23.83)                     | 226 (11.28)       | 107 (11.52)           | 332 (14.78)        |
| Renal disease                            | 1268 (12.07)                     | 1035 (32.60)                    | 489 (24.4)        | 214 (23.04)           | 821 (36.55)        |
| Arrhythmias                              | 935 (8.90)                       | 338 (10.65)                     | 159 (7.93)        | 45 (4.84)             | 293 (13.05)        |
| Hypertension                             | 5110 (48.65)                     | 1930 (60.79)                    | 1266 (63.17)      | 526 (56.62)           | 1404 (62.51)       |
| <b>Calcium Channel Inhibitor use (%)</b> |                                  |                                 |                   |                       |                    |
| Current user for < 1 year                | 326 (3.10)                       | 244 (7.69)                      | 57 (2.84)         | 48 (5.17)             | 196 (8.73)         |
| Current user for > 1 year                | 2330 (22.18)                     | 696 (21.92)                     | 530 (26.45)       | 220 (23.68)           | 476 (21.19)        |
| Past user                                | 140 (1.33)                       | 71 (2.24)                       | 254 (12.67)       | 9 (0.97)              | 62 (2.76)          |
| Non-user                                 | 7708 (73.38)                     | 2164 (68.16)                    | 1163 (58.03)      | 652 (70.18)           | 1512 (67.32)       |
| <b>Hormone Replace Therapy use (%)</b>   |                                  |                                 |                   |                       |                    |
| Current user for < 1 year                | 41 (0.39)                        | 10 (0.31)                       | 5 (17.24)         | 3 (0.32)              | 7 (0.31)           |
| Current user for > 1 year                | 97 (0.92)                        | 14 (0.44)                       | 24 (1.20)         | 6 (0.65)              | 8 (0.36)           |
| Past user                                | 11 (0.10)                        | 1 (0.03)                        | 200 (9.98)        | 0.00                  | 1 (0.04)           |
| Non-user                                 | 10355 (98.58)                    | 3150 (99.21)                    | 1775 (88.57)      | 920 (99.03)           | 2230 (99.29)       |
| Diabetes duration (year), mean (SD)      | 6.00 (7.76)                      | 11.73 (8.62)                    | 11.63 (7.27)      | 10.56 (7.13)          | 12.22 (9.13)       |

DPP-4= dipeptidyl peptidase-4 inhibitors; GLP-1= glucagon-like peptide-1 receptor agonists; BMI= Body Mass Index; HbA1c=haemoglobin A1c

Table S2. Results analysis insulin cohort

| Type of analysis | Group                             | Crude HR (95% CI) | Adjusted HR (95% CI) | p value |
|------------------|-----------------------------------|-------------------|----------------------|---------|
| Primary analysis | Other anti-diabetic exposed group | 1                 | 1                    |         |
|                  | Glitazones & DPP4                 | 1.20 (0.53-2.73)  | 1.66 (0.96-2.90)     | 0.07    |
|                  | GLP-mimetics*                     | 0.50 (0.12-2.12)  | 0.85 (0.37-1.94)     | 0.70    |
|                  | GTZ*                              | 0.78 (0.19-3.21)  | 0.92 (0.18-4.76)     | 0.93    |
|                  | DPP-4 inhibitors*                 | 1.57 (0.60-4.10)  | 0.81 (0.36-1.86)     | 0.62    |

\*<5 patients were diagnosed with PD
